# Supplementary material for: Simultaneous removal of organic matter and nitrogen compounds by partitioned aeration in a 226 L-scale microbial fuel cell
Source: Royal Society of Chemistry journal article supplement (doi:10.1039/d2ra01485h), 2022-01-01
Supplement: d2ra01485h1.pdf [file d2ra01485h1.pdf]

## **Supplemental information**

### **Simultaneous removal of organic matter and nitrogen compounds by partitioned aeration in a 226L-scale microbial fuel cell**

Taiki Yamanea,<sup>†</sup>, Naoko Yoshida,<sup>†,\*</sup> and Mari Sugiokaa

<sup>a</sup> Department of Civil and Environmental Engineering, Nagoya Institute of Technology (Nitech), Gokiso-Cho, Showa-Ku, Nagoya, Aichi, Japan.

<sup>†</sup>These authors contributed equally to this work.

\*Corresponding author: [yoshida.naoko@nitech.ac.jp](mailto:yoshida.naoko@nitech.ac.jp)

**Supplemental Figure S1. Comparison of BOD removal by MFCs with and without partial aeration.**

**Supplemental Figure S2. Relationships between CE and the three parameters: HRT (A), BODIN (B), and BODEF (C).**

**Supplemental Figure S3. Comparison of CE in MFCs with and without partial aeration.**

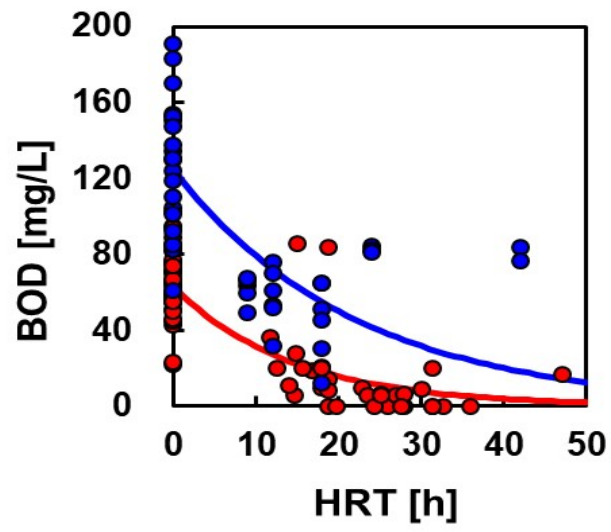

**Supplemental Figure S1. Comparison of BOD removal by MFCs with and without partial aeration.**

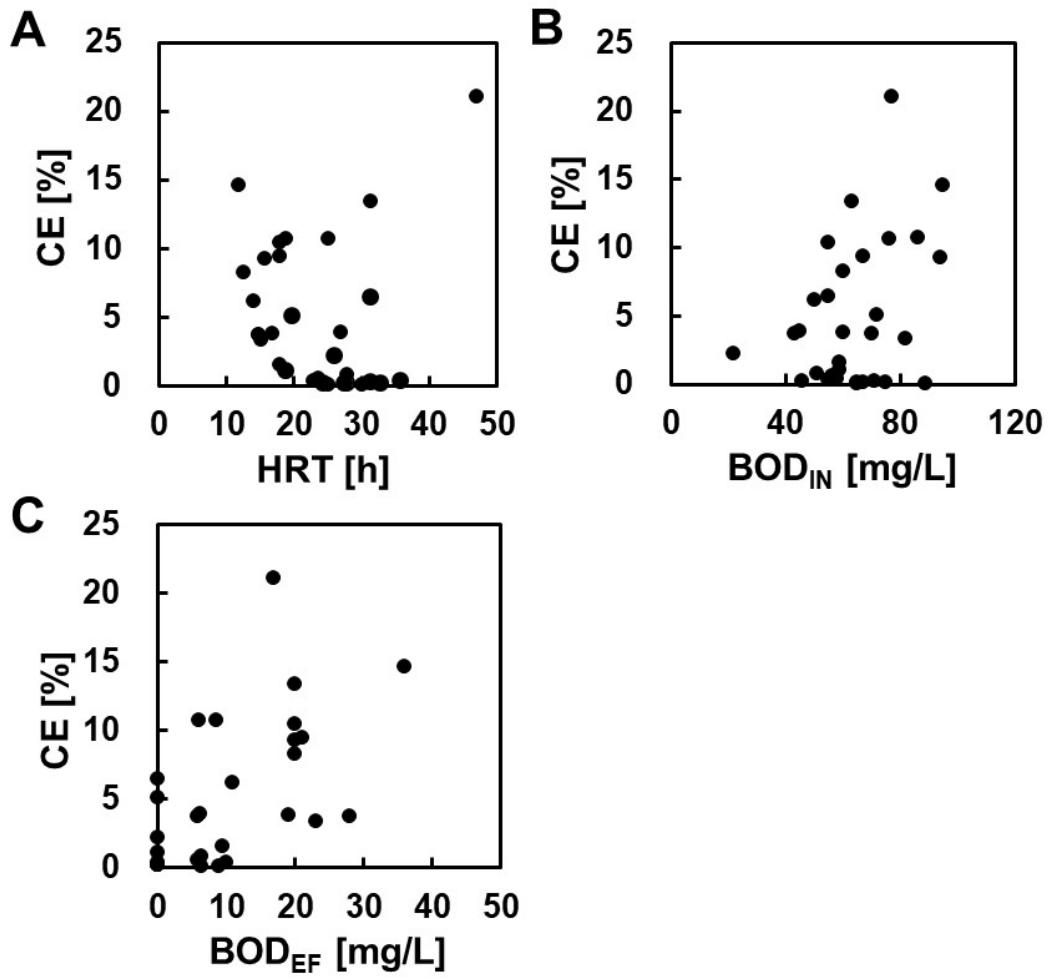

Supplemental Figure S2. Relationships between CE and the three parameters: HRT (A), BOD<sub>IN</sub> (B), and BOD<sub>EF</sub> (C).

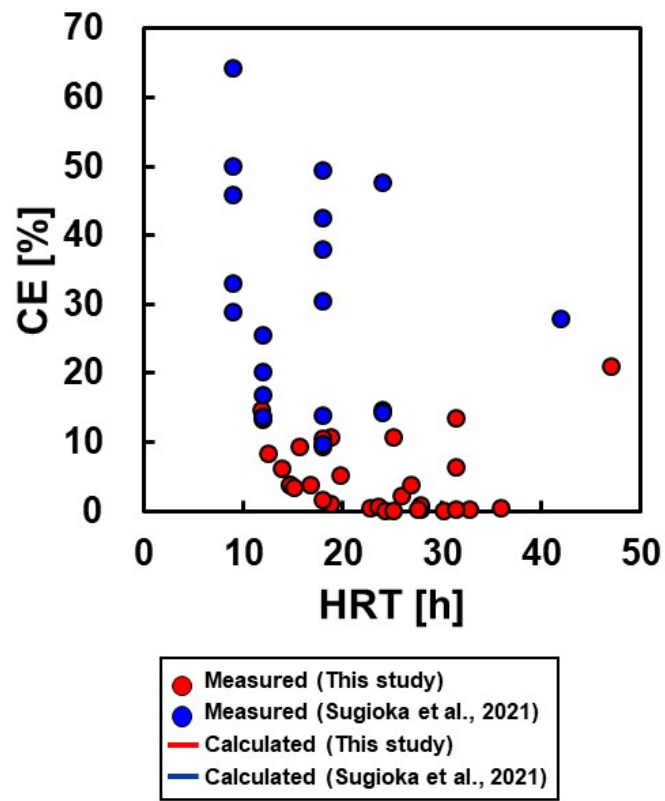

**Supplemental Figure S3. Comparison of CE in MFCs with and without partial aeration.**
